# Supplementary material for: Behavior and Motivational Profiles of Aging People's Participation in Swimming: A Cross-sectional Study in Southeastern China
Source: Research Square preprint supplement (doi:10.21203/rs.3.rs-6382936/v1), 2025-05-20
Supplement: Supplementary file 1 [file ccb9e4a82b07a91c9ac10590.docx]

**A survey on the current situation of swimming exercise behavioral characteristics and motivation of aging people**

Dear Swimmers,

The purpose of this survey is to understand the characteristics of behaviors and motivations of swimming exercise among aging adults. Please complete the questionnaire based on your actual situation. This survey is anonymous and will not compromise your interests or privacy. There are no right or wrong answers; we hope to receive your complete and truthful responses. Thank you for your support.

**I. The characters of aging people**

1. You are _____ years old.

2. Your gender is

A. Male B. Female

3. Your education is

1. Primary school B. Middle school-high school C. Bachelor's degree D. Graduate or above

4. Your monthly income after taxes

A. 2,000 Yuan and below B. 2,001-3,000 Yuan C. 3,001-4,000 Yuan D. 4,001 -5000 Yuan E 5000 Yuan and above

**II. Swimming Exercise Behavior of Aging People**

1. How many times a week do you swim for exercise on average:

A. 2 times or less B. 2 to 3 times C. 4 to 5 times D. 5 times or more

2. What is the approximate duration of each swimming workout

A. within 30 minutes B. 30 to 60 minutes C. more than 60 minutes

3. Which swimming stroke do you use for exercise?（Multiple Choice Question）

1. Breaststroke B. Backstroke C. Freestyle D. Butterfly E. Anti-breaststroke F. Irregular position, can't sink can swim away G. Only hits legs

4. Which statement best describes your warm-up routine before entering the water to swim?

A. I do not perform any warm-up activities.

B. I do not perform warm-up exercises, but I acclimatize to the water temperature first

C. I perform a thorough warm-up until my body feels fully prepared.

D. I perform a brief or casual warm-up.

5. How would you rate the intensity of your swimming workouts?

A. Very light B. Light C. Moderate D. Hard E. Very hard

**III. Swimming Exercise Motivation of aging People**

1. I want to I want to be strong and fit

A. Strongly Disagree B. Disagree C. Neutral D. Agree E. Strongly Agree

2. I want to enhance friendships

A. Strongly Disagree B. Disagree C. Neutral D. Agree E. Strongly Agree

3. I want to engage in recreational activities

A. Strongly Disagree B. Disagree C. Neutral D. Agree E. Strongly Agree

4. I want to improve my physique

A. Strongly Disagree B. Disagree C. Neutral D. Agree E. Strongly Agree

5. I want to make new friends

A. Strongly Disagree B. Disagree C. Neutral D. Agree E. Strongly Agree

6. I want to enhance my appearance

A. Strongly Disagree B. Disagree C. Neutral D. Agree E. Strongly Agree

7. I want to stay physically and mentally healthy

A. Strongly Disagree B. Disagree C. Neutral D. Agree E. Strongly Agree

8. I want to acquire new exercise skills

A. Strongly Disagree B. Disagree C. Neutral D. Agree E. Strongly Agree

9. I want to maintain a pleasant mood

A. Strongly Disagree B. Disagree C. Neutral D. Agree E. Strongly Agree

10. I want to control my weight

A. Strongly Disagree B. Disagree C. Neutral D. Agree E. Strongly Agree

11. I desire to lead a healthy life

A. Strongly Disagree B. Disagree C. Neutral D. Agree E. Strongly Agree

12. I want to improve existing sports skills

A. Strongly Disagree B. Disagree C. Neutral D. Agree E. Strongly Agree

13. I want to enjoy a happy life

A. Strongly Disagree B. Disagree C. Neutral D. Agree E. Strongly Agree

14. I want to maintain social relationships

A. Strongly Disagree B. Disagree C. Neutral D. Agree E. Strongly Agree

15. I want to maintain the current level of sports skills

A. Strongly Disagree B. Disagree C. Neutral D. Agree E. Strongly Agree
